# Supplementary material for: Treatment induced remarkable enhancement of low-temperature activity and selectivity of copper-based catalysts for NO reduction
Source: Royal Society of Chemistry journal article supplement (doi:10.1039/c3cy20698j), 2013-01-01
Supplement: c3cy20698j.pdf [file c3cy20698j.pdf]

## SUPPORTING INFORMATION

For

### **Treatment Induced Remarkable Enhancement on Low-temperature Activity and Selectivity of Copper-based Catalysts for NO Reduction**

*Chengyan Ge,<sup>a</sup> Lianjun Liu,<sup>a\*</sup> Xiaojiang Yao,<sup>a</sup> Changjin Tang,<sup>a</sup> Fei Gao,<sup>b</sup>*

*Lin Dong<sup>a,b\*</sup>*

*<sup>a</sup>Key Laboratory of Mesoscopic Chemistry of MOE, School of Chemistry and  
Chemical Engineering, Nanjing University, Nanjing, 210093, P. R. China*

*<sup>b</sup>Jiangsu Key Laboratory of Vehicle Emissions Control, Center of Modern Analysis,  
Nanjing University, Nanjing 210093, PR China*

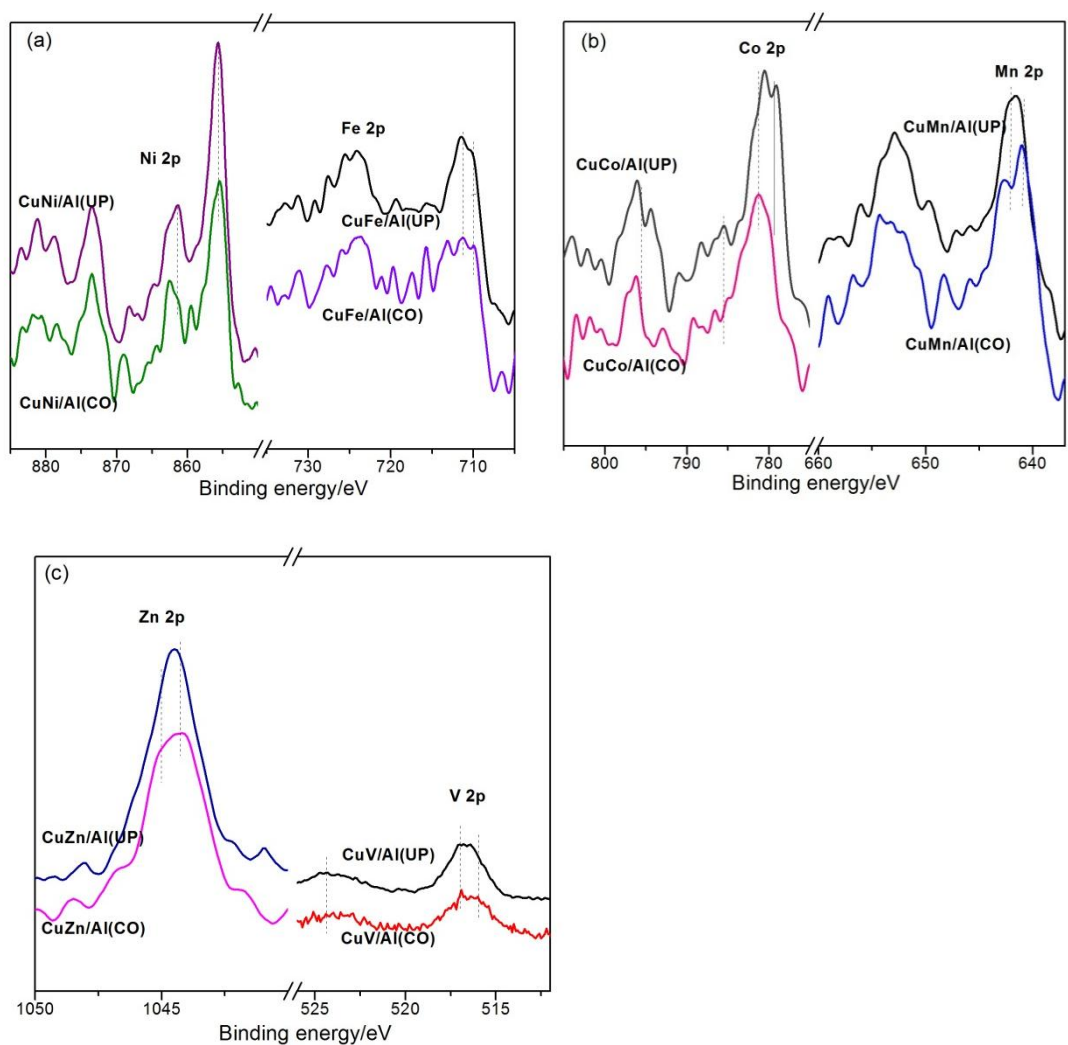

**Figure S1** XPS spectra of Ni, Fe, Co, Mn, Zn and V 2p for CuM/Al(UP) and CuM/Al(CO) catalysts

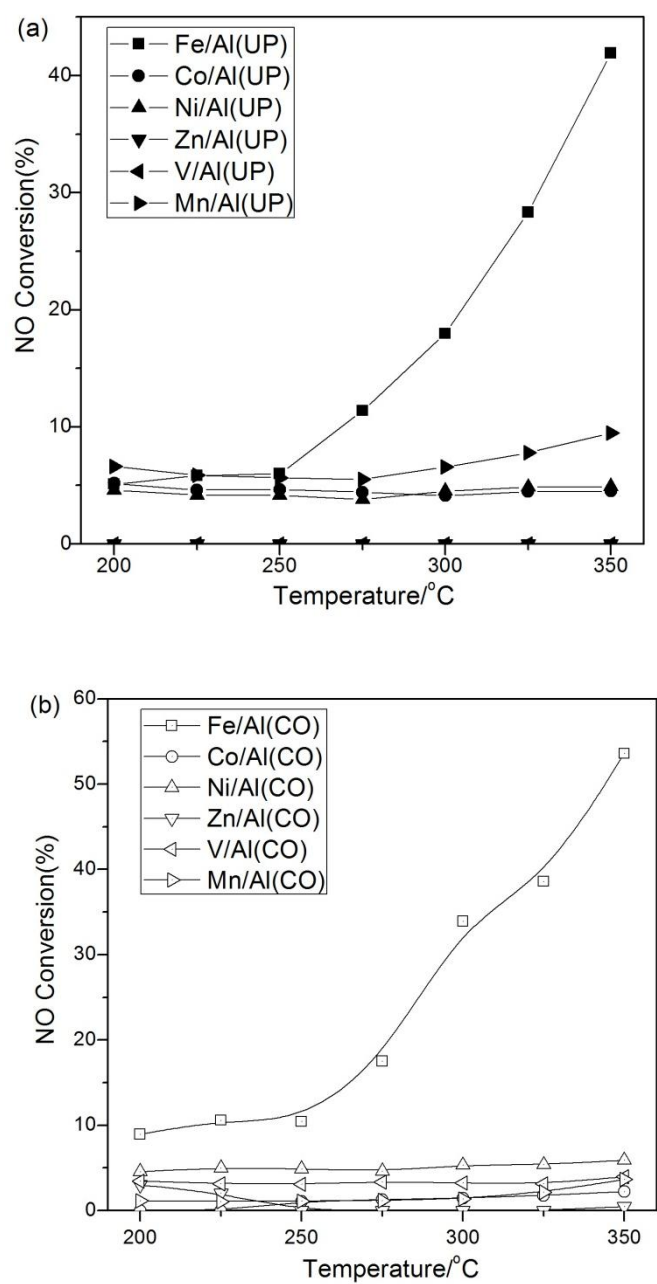

**Figure S2.** NO conversion on (a) M/Al(UP) and (b) M/Al(CO) (M = V, Mn, Fe, Co, Ni, Zn) catalysts at different temperatures

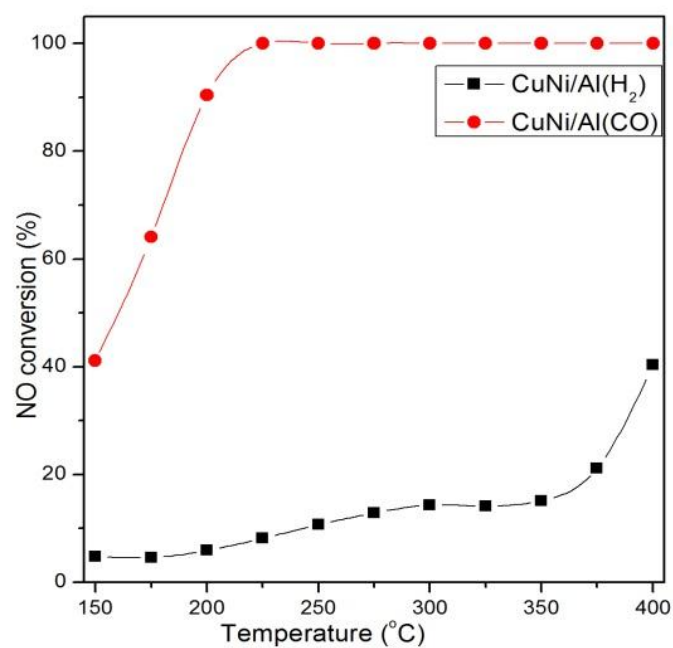

**Figure S3.** NO conversion on CuNi/Al(CO) and CuNi/Al(H<sub>2</sub>) catalysts at different temperatures

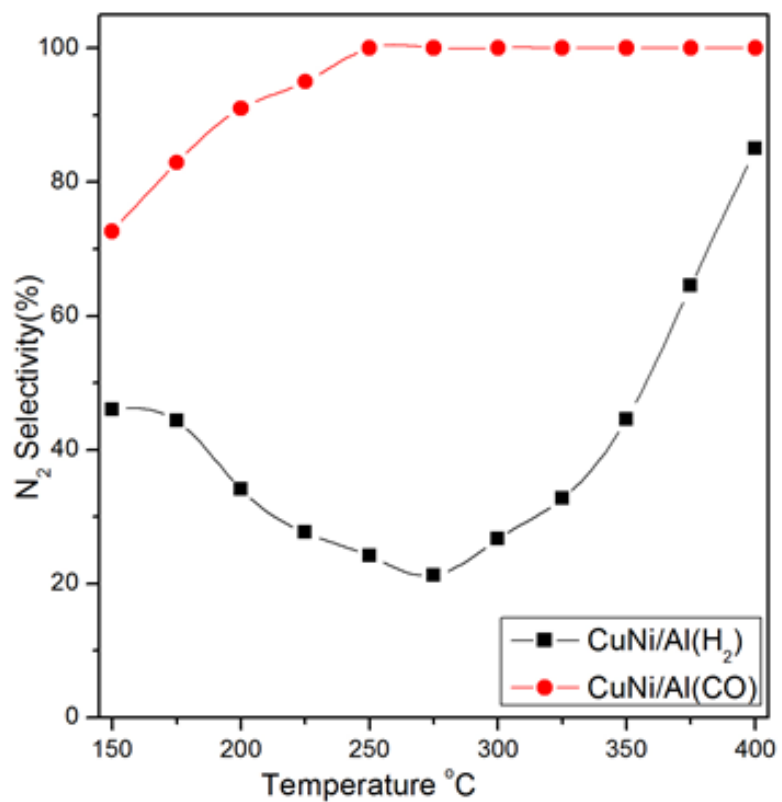

**Figure S4.** N<sub>2</sub> selectivity on CuNi/Al(CO) and CuNi/Al(H<sub>2</sub>) catalysts at different temperatures
